# Supplementary material for: Greenhouse Gas Implications of Extending the Service Life of PEM Fuel Cells for Automotive Applications: A Life Cycle Assessment
Source: MDPI journal article supplement (doi:10.3390/cleantechnol4010009), 2022-02-23
Supplement: s1 [file s1]

Archive with 1 entries (1 files):
- cleantechnol-1553465-supplementary.pdf
